# Supplementary material for: A Recombinase-Based Genetic Circuit for Heavy Metal Monitoring
Source: MDPI journal article supplement (doi:10.3390/bios12020122), 2022-02-16
Supplement: s1 [file s1]

Supplementary Information

# A Recombinase-Based Genetic Circuit for Heavy Metal Monitoring

Doğuş Akboğa <sup>1</sup>, Behide Saltepe <sup>1</sup>, Eray Ulaş Bozkurt <sup>1</sup> and Urartu Özgür Şafak Şeker <sup>1,\*</sup>

<sup>1</sup> UNAM- Institute of Materials Science and Nanotechnology, Bilkent University, Ankara 06800, Turkey; dogus.akboga@bilkent.edu.tr (D.A.); behide.saltepe@bilkent.edu.tr (B.S.); ulas.bozkurt@bilkent.edu.tr (E.U.B.)

\* Correspondence: urartu@bilkent.edu.tr

**Table S1.** List of oligonucleotides used in this study.

| Primer Set                                                 | Sequence (5' - 3')                                                                                                                        | Usage                                           |
|------------------------------------------------------------|-------------------------------------------------------------------------------------------------------------------------------------------|-------------------------------------------------|
| <b>P<sub>cadA</sub>-FWD</b><br><b>P<sub>cadA</sub>-REV</b> | TGCCAAGTGAACACCCTGTAGCCAC-<br>TATAGGGTCAAGCCGCCCG-<br>GATGATCCTGAC<br><br>CTATAGTGGCTACAGGGTGTTTAC-<br>TTGGCAACAGGCGTCGGGGTTT-<br>GTACCGT | P <sub>cadA</sub> addition to the output module |
| <b>Bxb1-FWD</b><br><b>Bxb1-REV</b>                         | AGCGGGGTGCACTCATCAAAGAG-<br>GAGAAAGGTACCATGGGAACGGTG<br><br>TCTTCATGGTAC-<br>CTTTCTCCTCTTTAATACGCGTTTAC-<br>GACATCCCGGTGTG                | Overhang primers for Bxb1                       |
| <b>CadR-FWD</b><br><b>CadR-REV</b>                         | GAACGGCTACACACCGGGATGTCG-<br>TAAACGCGTATTAAGAGGA-<br>GAAAGGTACCA<br><br>GAGCCTTTCGTTTATTT-<br>GATGCCCTGCAG-<br>TTAATGCCCCGTGGCTTC         | Overhang primers for CadR                       |

**Table S2.** List of genetic parts and sequences used in this study.

| Part              | Type                       | Sequence (5' - 3')                                                                                                                                                                                   |
|-------------------|----------------------------|------------------------------------------------------------------------------------------------------------------------------------------------------------------------------------------------------|
| P <sub>dnaK</sub> | Stress Inducible Promoter  | AAAAGCACAAAAAATTTTTGCATCTCCCCCTTGATGACGTGGTTT<br>ACGACCCCATTTAGTAGTCAACCGCAGTGAGTGAGTCTGCAAAA<br>AAATGAAATTGGGCAGTTGAAACCAGACGTTTCGCCCTATTACA<br>GACTCACAACCACATGATGACCGAATATATAGTGAGACGTTTA<br>GATG |
| mProD             | Constitutive Promoter      | TCTAGATTTACAGCTAGCTCAGTCCTAGGTATAATGCTAGCTACT<br>AGAG                                                                                                                                                |
| P <sub>cadA</sub> | Cadmium Inducible Promoter | TTGACTCTGTAGTTGCTACAGGGTGTGCAAT                                                                                                                                                                      |

|           |            |                                                                                                                                                                                                                                                                                                                                                                                                                                                                                                                                                                                                                                                                                                                                                                                                                                                                                                                                                                                                                                                                                                                                                                                                                                                                                                                                         |
|-----------|------------|-----------------------------------------------------------------------------------------------------------------------------------------------------------------------------------------------------------------------------------------------------------------------------------------------------------------------------------------------------------------------------------------------------------------------------------------------------------------------------------------------------------------------------------------------------------------------------------------------------------------------------------------------------------------------------------------------------------------------------------------------------------------------------------------------------------------------------------------------------------------------------------------------------------------------------------------------------------------------------------------------------------------------------------------------------------------------------------------------------------------------------------------------------------------------------------------------------------------------------------------------------------------------------------------------------------------------------------------|
| IR3       | Regulatory | GCAAGCTTGAGCGGGGTGCACTCATCA                                                                                                                                                                                                                                                                                                                                                                                                                                                                                                                                                                                                                                                                                                                                                                                                                                                                                                                                                                                                                                                                                                                                                                                                                                                                                                             |
| Bxb1 attP | Regulatory | GTCGTGGTTTGTCTGGTCAACCACCGCGGTCTCAGTGGTGTACGG<br>TACAAACCCCGAC                                                                                                                                                                                                                                                                                                                                                                                                                                                                                                                                                                                                                                                                                                                                                                                                                                                                                                                                                                                                                                                                                                                                                                                                                                                                          |
| Bxb1 attB | Regulatory | GCCCCGATGATCCTGACGACGGAGACCGCCGTCGTCGACAAGCC<br>GGCCGA                                                                                                                                                                                                                                                                                                                                                                                                                                                                                                                                                                                                                                                                                                                                                                                                                                                                                                                                                                                                                                                                                                                                                                                                                                                                                  |
| RBS       | Regulatory | AAAGAGGAGAAA                                                                                                                                                                                                                                                                                                                                                                                                                                                                                                                                                                                                                                                                                                                                                                                                                                                                                                                                                                                                                                                                                                                                                                                                                                                                                                                            |
| rrnBT1    | Terminator | CAAATAAAACGAAAGGCTCAGTCGAAAGACTGGGCCTTTCGTTT<br>TATCTGTTGTTTGTCCGGTGAACGCTCTCCTGAGTAGGACAAAT<br>ATGCGTAAAGGAGAAGAAGCTTTTCACTGGAGTTGTCCCAATTCTT<br>GTTGAATTAGATGGTGTATGTTAATGGGCACAAATTTTCTGTCTCAGT<br>GGAGAGGGTGAAGGTGATGCAACATACGGAAAACCTTACCCTTAA<br>ATTTATTTGCACTACTGGAAAACCTGTTCCATGGCCAACACTT<br>GTCACTACTTTTCGGTTATGGTGTTCATGCTTTGCGAGATACCCAG<br>ATCATATGAAACAGCATGACTTTTTCAAGAGTGCCATGCCCGAAG<br>GTTATGTACAGGAAAGAACTATATTTTTCAAAGATGACGGGAACT<br>ACAAGACACGTGCTGAAGTCAAGTTTGAAGGTGATACCCTTGTTA<br>ATAGAATCGAGTTAAAAGGTATTGATTTTAAAGAAGATGGAAAC<br>ATTCTTGACACAAATTGGAATACAACATAACTCACACAATGTA<br>TACATCATGGCAGACAAACAAAAGAATGGAATCAAAGTTAACTT<br>CAAAATTAGACACAACATTGAAGATGGAAGCGTTCAACTAGCAG<br>ACCATTATCAACAAAATACTCCAATTGGCGATGGCCCTGTCTTT<br>TACCAGACAACCATTACCTGTCCACACAATCTGCCCTTTCGAAAG<br>ATCCCAACGAAAAGAGAGACCACATGGTCTTCTTGAGTTTGTA<br>CAGCTGCTGGGATTACACATGGCATGGATGAACTATACAAATAA<br>ATGGCCAAAAATCCGAAAGATGGCGAAAGCCGCACCTTCCTGAT<br>TAGCGTGGCCGCCGAAGTGGCCGGTATGCATGCCAGACCCTGC<br>GCACCTATGATCGTCTGGGTCTGGTGAGCCCGCGTCGTACCAGTG<br>GTGGTGGTCGTCTGTTATAGCCTGCATGATGTGGAGCTGCTGCGCC<br>AGGTTACAGCATCTGAGCCAGGATGAAGGCGTGAATCTGGCCGGC<br>ATCAAACGCATCATTGAACTGACCAGCCAGGTGGAAGCACTGCA<br>GAGCCGCCTGCAGGAAATGGCCGAAGAACTGGCCGTGCTGCGCG<br>CCAATCAGCGTCGTGAAGTGGCCGTGGTGCCGAAAAGCACCGCC<br>CTGGTGGTGTGGAACCGCGTCGTTAA |
| GFP       | CDS        | ATGAAGATCGGAGAACTGGCCAAAGCCACCGACTGCGCCGTGGA<br>AACCATCCGCTACTACGAGCGTGAACAGCTGCTGCCGGAGCCGG<br>CACGCAGCGACGGCAACTACCGGCTGTACACCCAGGCCACGTC<br>GAGCGGCTTACCTTCATCCGCAACTGCCGCACCCTGGACATGACC<br>CTGGATGAAATCCGCAGCCTGCTACGCCTGCGCGACAGCCCCGA<br>TGATTTCGTGCGGCAGCGTCAATGCGCTGATCGACGAGCATATCGA<br>GCATGTGCAGGCACGGATCGATGGTCTGGTGGCGTTGCAGGAAC<br>AGCTGGTGGAGCTGCGGCGGCGCTGCAATGCACAAGGGGCGGA<br>GTGTGCGATCTTGCAGCAACTGGAGACGAACGGGGCGGTATCGG<br>TGCCGGAACCGAGCATTGCGATGTAGGGCGAAGCCACGGGCAT<br>TAA                                                                                                                                                                                                                                                                                                                                                                                                                                                                                                                                                                                                                                                                                                                                                                                                                                     |
| HspR      | CDS        | ATGGGAACGGTGGCGCAGATGGAATTAGAAGCGATCAAAGAGC<br>GGAACCGTTCGGCTGCGCATTTCATATCCGCGCCGGGAAATACC<br>GAGGATCCCTGCCGCCGTGGGGATACCTGCCTACGCGCGTGGAC<br>GGGGAGTGGCGGCTGGTGGCCGACCTGTGCAGCGAGAGCGCAT<br>CCTCGAGGTGTATCACCGCGTCGTCGACAACCACGAGCCGCTGC<br>ATCTGGTGGCCACGACCTGAACCGGCGTGGTGTCTGTGCGCGA<br>AGGACTACTTCGCGCAGCTGCAAGGCCGCGAGCCGAGGGCCGG                                                                                                                                                                                                                                                                                                                                                                                                                                                                                                                                                                                                                                                                                                                                                                                                                                                                                                                                                                                                |
| CadR      | CDS        | ATGGGAACGGTGGCGCAGATGGAATTAGAAGCGATCAAAGAGC<br>GGAACCGTTCGGCTGCGCATTTCATATCCGCGCCGGGAAATACC<br>GAGGATCCCTGCCGCCGTGGGGATACCTGCCTACGCGCGTGGAC<br>GGGGAGTGGCGGCTGGTGGCCGACCTGTGCAGCGAGAGCGCAT<br>CCTCGAGGTGTATCACCGCGTCGTCGACAACCACGAGCCGCTGC<br>ATCTGGTGGCCACGACCTGAACCGGCGTGGTGTCTGTGCGCGA<br>AGGACTACTTCGCGCAGCTGCAAGGCCGCGAGCCGAGGGCCGG                                                                                                                                                                                                                                                                                                                                                                                                                                                                                                                                                                                                                                                                                                                                                                                                                                                                                                                                                                                                |
| Bxb1      | CDS        | ATGGGAACGGTGGCGCAGATGGAATTAGAAGCGATCAAAGAGC<br>GGAACCGTTCGGCTGCGCATTTCATATCCGCGCCGGGAAATACC<br>GAGGATCCCTGCCGCCGTGGGGATACCTGCCTACGCGCGTGGAC<br>GGGGAGTGGCGGCTGGTGGCCGACCTGTGCAGCGAGAGCGCAT<br>CCTCGAGGTGTATCACCGCGTCGTCGACAACCACGAGCCGCTGC<br>ATCTGGTGGCCACGACCTGAACCGGCGTGGTGTCTGTGCGCGA<br>AGGACTACTTCGCGCAGCTGCAAGGCCGCGAGCCGAGGGCCGG                                                                                                                                                                                                                                                                                                                                                                                                                                                                                                                                                                                                                                                                                                                                                                                                                                                                                                                                                                                                |

GAGTGGTCGGCTACCGCGCTGAAGCGATCGATGATCTCCGAGGC  
 GATGCTCGGGTACGCGACTCTGAACGTAAGACCGTCCGAGACG  
 ACGACGGAGCCCCGCTGGTGCGGGCTGAGCCGATCCTGACCCGT  
 GAGCAGCTGGAGGCGCTGCGCGCCGAGCTCGTGAAGACCTCCCC  
 GGCGAAGCCCCGCGGTGTCTACCCCGTCGCTGCTGCTGCGGGTGT  
 GTTCTGCGCGGTGTGCGGGGAGCCCGCGTACAAGTTCGCCGGGG  
 GAGGACGTAAGCACCCGCGCTACCGCTGCCGCTCGATGGGGTTC  
 CCGAAGCACTGCGGGAACGGCACGGTGGCGATGGCCGAGTGGG  
 ACGCGTTCTGCGAGGAGCAGGTACTGGATCTGCTCGGGGACGCG  
 GAGCGTCTGGAGAAAGTCTGGGTAGCGGGCTCGGACTCCGCGGT  
 CGAACTCGCGGAGGTGAACGCGGAGCTGGTGGACCTGACGTCGC  
 TGATCGGCTCCCCGGCCTACCGGGCGGGCTCTCCGCAGCGAGAA  
 GCACTGGATGCCCCGTATTGCGGCGCTGGCCGCGCGGCAAGAGGA  
 GCTGGAGGGCCTGGAGGCTCGCCCGTCTGGCTGGGAGTGGCGCG  
 AGACCGGGCAGCGGTTCCGGGACTGGTGGCGGGAGCAGGACAC  
 CGCGGCAAAGAACACCTGGCTTCGGTCGATGAACGTTCCGGCTGA  
 CGTTCGACGTCCGCGGCGGGCTGACTCGCACGATCGACTTCGGG  
 GATCTTCAGGAGTACGAGCAGCATCTCAGGCTCGGCAGCGTGGT  
 CGAACGGCTACACACCGGGATGTCGTAA

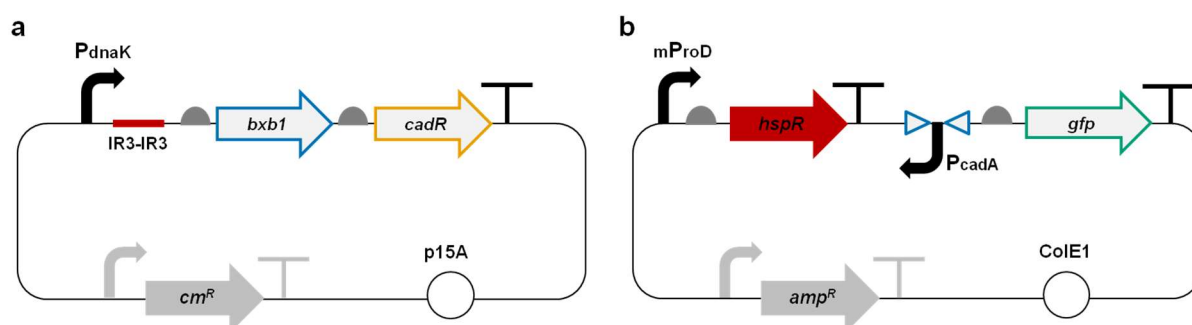

**Figure S1.** Representative plasmid maps of the cadmium sensor. Plasmid map containing actuating module (a) and sensing and output modules (b). “T” represents terminator.

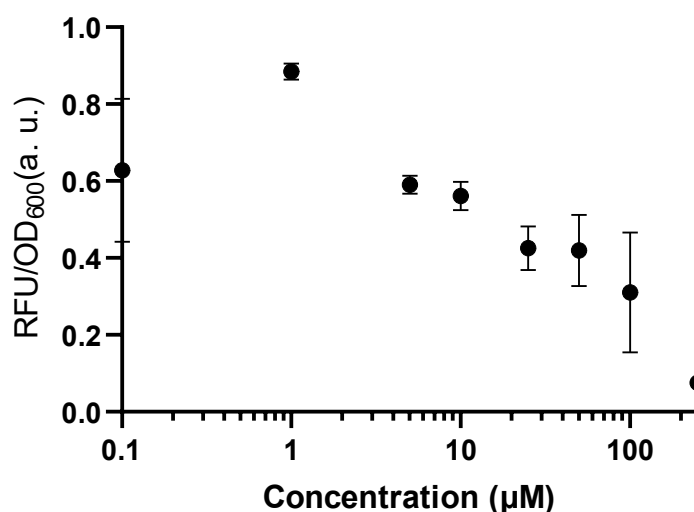

**Figure S2.** Cadmium-related toxicity for Escherichia coli DH5α strain. The initial number of cells was 1:50 of culture volume. The cells were cultured in MOPS minimal media with a pH of 7.5 at 37°C for 14h. Measurements were done on 96-well plates. The fluorescence intensity of each group

was compared with each other and normalized according to the formula stated in the Materials and Methods section. Data were visualized with mean  $\pm$  standard error mean (SEM) in each graph. At least three biological replicates were used for each analysis.

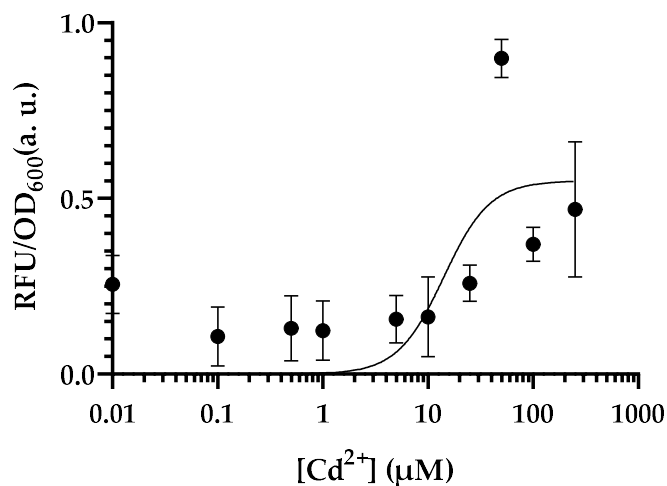

**Figure S3.** The system response with 100  $\mu\text{M}$  and 250  $\mu\text{M}$ . The initial number of cells was 1:50 of culture volume. The cells were cultured in MOPS minimal media with a pH of 7.5 at 37°C for 10h. Measurements were done on 96-well plates. The fluorescence intensity of each group was compared with each other and normalized according to the formula stated in the Materials and Methods section. Data were visualized with mean  $\pm$  standard error mean (SEM) in each graph. At least three biological replicates were used for each analysis.
